# Supplementary material for: MSC polarization in the microenvironment promotes pathological new bone formation in inflammatory lesions
Source: Research Square preprint supplement (doi:10.21203/rs.3.rs-7508709/v1), 2025-10-08
Supplement: Supplementary file 1 [file 17d73cf5d491085f564d9bfe.docx]

**Supplementary Table 2 List of primers and antibodies**

|  | **Human primers** |
| --- | --- |
| **IL17A (CTLA-8)** | FORWARD-TCTGTCCCCATCCAGCAAGA;  REVERSE-CCCACGGACACCAGTATCTTC; |
| **JAK2 (Janus kinase 2)** | FORWARD-TGTGCCGGTATGACCCTCTA;  REVERSE-GCACTGTAGCACACTCCCTT; |
| **STAT3 (Signal transducer and activator of transcription 3)** | FORWARD-AGCAGCACCTTCAGGATGTC;  REVERSE-GCATCTTCTGCCTGGTCACT; |
| **WNT10B (Wingless-type MMTV integration site family, member 10B)** | FORWARD-CAACACCGTGTGCTTGACG;  REVERSE-CTGGTGCTGACACTCGTGG; |
| **Runx2 (Runt related transcription factor 2)** | FORWARD-TTCCAGAATGCTTCCGCCAT;  REVERSE-GCCTCAGGATTGTGTTGTGC; |
| **DKK1 (Dickkopf A)** | FORWARD-GCCTCAGGATTGTGTTGTGC;  REVERSE-ATCCGGCAAGACAGACCTTC; |
| **β-ACTIN** | FORWARD-GGCTGTGCTATCCCTGTACG;  REVERSE-AGGTAGTCAGTCAGGTCCCG; |
|  | **Mouse primers** |
| **Il17a (CTLA-8)** | FORWARD-TCTCCACCGCAATGAAGACC;  REVERSE- AAAGTGAAGGGGCAGCTCTC; |
| **Il23a (Interleukin 23, alpha subunit p19)** | FORWARD-CAGCCTGAGTTCTAGTCAGCA;  REVERSE-CTGGGCATCCTTAAGCTGTTG; |
| **Il10 (Interleukin 10)** | FORWARD-AGCCTTATCGGAAATGATCCAGT;  REVERSE-GGCCTTGTAGACACCTTGGT; |
| **Cxcl10 (C-X-C motif chemokine ligand 10 or IP-10 )** | FORWARD-CCAAGTGCTGCCGTCATTTTC;  REVERSE-GGCTCGCAGGGATGATTTCAA; |
| **Jak2 (Janus kinase 2)** | FORWARD-GGAATGGCCTGCCTTACAATG;  REVERSE-TGGCTCTATCTGCTTCACAGAAT; |
| **Stat3 (Signal transducer and activator of transcription 3)** | FORWARD-CACCTTGGATTGAGAGTCAAGAC;  REVERSE-AGGAATCGGCTATATTGCTGGT; |
| **Wnt10b (Wingless-type MMTV integration site family, member 10B)** | FORWARD-GGCTGTAACCACGACATGGA;  REVERSE-GCATTTGCACTTCCGCTTCA; |
| **Runx2 (Runt related transcription factor 2)** | FORWARD-CATGGCCGGGAATGATGAGA;  REVERSE-TGAAACTCTTGCCTCGTCCG; |
| **Smad5 (mothers against decapentaplegic homolog 5)** | FORWARD-TGTTGGGCTGGAAACAAGGT;  REVERSE-GTGACACACTTGCTTGGCTG; |
| **GAPDH** | FORWARD-AGGTCGGTGTGAACGGATTTG;  REVERSE-TGTAGACCATGTAGTTGAGGTCA; |
| **Antibodies** |  |
| **Anti-mouse CD25-PE (Ly43)** | Biolegend, USA |
| **Anti-mouse CD34-APC (APG)** | Biolegend, USA |
| **Anti-mouse CD90-Alexa Fluor 488 (Thy1.2)** | Biolegend, USA |
| **Anti-mouse CD105-PE/Cy7 (Endoglin)** | Biolegend, USA |
| **Anti-mouse CD154-PerCP/Cy (CD40)** | Biolegend, USA |
| **Anti-mouse CD283-PE (TLR3)** | Biolegend, USA |
| **Anti-mouse CD284-APC (TLR4)** | Biolegend, USA |
| **Anti-mouse F4/80-FITC (EMR1)** | Biolegend, USA |
| **Anti-mouse CD206-PE (MMR)** | Biolegend, USA |
| **Anti-mouse IL-17A-Brilliant Violet 421 (CTLA-8)** | Biolegend, USA |
| **Anti-human CD40-PE (BP50)** | Biolegend, USA |
| **Anti-human CD90-PerCP/Cy5.5 (Thy1)** | Biolegend, USA |
| **Anti-human CD283-PE (TLR3)** | Biolegend, USA |
| **Anti-** **human CD284-APC (TLR4)** | Biolegend, USA |
| **Anti-human/mouse CD44-Alexa Fluro 488** | Biolegend, USA |
| **Anti-mouse CD4-FITC (L3T4)** | eBioscience, USA |
| **Anti-mouse CD45-FITC (LCA)** | eBioscience, USA |
| **Anti-human CD34-APC (APG)** | eBioscience, USA |
| **Anti-human CD105-PE (Endoglin)** | eBioscience, USA |
| **Rabbit polyclonal anti-JAK2 [EPR108(2)]** | Abcam, UK |
| **Rabbit polyclonal anti-STAT3 [EPR787Y]** | Abcam, UK |
| **Rabbit polyclonal anti-WNT10b** | Abcam, UK |
| **Rabbit polyclonal anti-RUNX2** | Abcam, UK |
| **Mouse monoclonal anti-SMAD5 [4B10-B10-B6]** | Abcam, UK |
| **monoclonal mouse anti-ACTIN** | Kangchen, China |
