# Supplementary material for: MSC polarization in the microenvironment promotes pathological new bone formation in inflammatory lesions
Source: Research Square preprint supplement (doi:10.21203/rs.3.rs-7508709/v1), 2025-10-08
Supplement: Supplementary file 2 [file f28f0cc2fb93f86b029d3577.docx]

**Supplementary Table 1 Baseline characteristics of AS patients and healthy donors**

| **Items** | **Group NBF-AS**  **(N = 12)** | **Group NBF+AS**  **(N = 11)** | **Group HD**  **(N = 9)** |
| --- | --- | --- | --- |
| **Age, mean (±sem) years** | 36.2 (±2.4) | 44.3 (±3.4) | 43.2 (±4.5) |
| **Sex, male (%)** | 9 (75%) | 10 (91%) | 6 (67%) |
| **Marriage** | 67% | 100% | 78% |
| **Degree of education#, median (range)** | 4 (1-4) | 2 (1-4) | 3 (1-4) |
| **Place of birth,**  **Southern (%)** | 75% | 73% | 89% |
| **Precipitating factors (%)** | 33% | 27% |  |
| **Family history (%)** | 33% | 27% |  |
| **Age of initial pain,**  **mean (±sem) years** | 19.6 (±2.1) | 25.8 (±4.2) |  |
| **Duration of disease,**  **mean (±sem) years** | 16.1 (3.0) | 18.5 (3.2) |  |
| **Accompanied diseases*, median (range)** | 1 (1-4) | 1 (1-4) |  |
| **ESR (mm/H)** | 18.1 (±2.1) | 19.1 (±2.8) |  |
| **CRP (mg/L)** | 20.1 (±5.9) | 12.2 (±1.9) |  |
| **HLA-B27** | All positive | All positive |  |

#Degree of education was assigned by a score of 0-4 (0, none; 1, primary school; 2, middle school; 3, undergraduate; 4, graduate). * Accompanied diseases included hip or knee arthritis, dactylitis, enthesopathy, psoriasis, uveitis, inflammatory bowel disease or cardiovascular diseases. AS: ankylosing spondylitis. HD: healthy donors. ESR: erythrocye sedimentation rate with normal range of 0-20 mm/H. CRP: C reactive protein with normal range of 0-10 mg/L.
